## Potential cardiovascular risk reduction with evolocumab in the real world: a simulation in patients with a history of myocardial infarction from the HEYMANS register

K. Ray<sup>1</sup>, I. Bridges<sup>2</sup>, E. Bruckert<sup>3</sup>, P. Perrone-Filardi<sup>4</sup>, L. Annemans<sup>5</sup>, M. Sibartie<sup>6</sup>, N. Dhalwani<sup>2</sup>, G. Villa<sup>6</sup>

<sup>1</sup>Imperial College London, London, United Kingdom; <sup>2</sup>Amgen Limited, Cambridge, United Kingdom; <sup>3</sup>University Pierre & Marie Curie Paris VI, Paris, France; <sup>4</sup>Federico II University Hospital, Naples, Italy; <sup>5</sup>Ghent University, Ghent, Belgium; <sup>6</sup>Amgen (Europe) GmbH, Rotkreuz, Switzerland

**Funding Acknowledgement:** Type of funding sources: Private company. Main funding source(s): Amgen

**Background/Introduction:** FOURIER included 22,351 patients with a history of myocardial infarction (MI) and a median low-density lipoprotein cholesterol (LDL-C) of 2.4 mmol/L. Reducing LDL-C with evolocumab reduced the risk of major cardiovascular (CV) events by 1.3%, in absolute terms, over 2.2 years. Whether similar benefits might be observed in real-world evidence from evolocumab use is unknown.

**Purpose:** Simulate CV risk and assess the potential CV risk reduction among a large European cohort of evolocumab users with a history of MI.

**Methods:** We used interim data from HEYMANS, a register of patients initiating evolocumab in routine clinical practice across 12 European countries, from August 2015 with follow-up through July 2020. Demographic and clinical characteristics, lipid-lowering therapy (LLT), and lipid values were collected from routine medical records (6 months prior to evolocumab initiation through 30 months post initiation). Patients with a history of MI were considered and two sub-cohorts were created: recent MI (MI  $\leq 1$  year before evolocumab initiation) and remote MI (MI  $> 1$  year before evolocumab initiation). For each patient, we 1) simulated their CV risk using three different sources, correcting for age and LDL-C: i) the REACH equation, ii) FOURIER, iii) an observational study including FOURIER-like patients; 2) calculated their absolute LDL-C reduction on evolocumab; 3) simulated

their relative risk reduction (RRR) by randomly sampling from the inverse probability distribution of the rate ratio per 1 mmol/L from the key secondary endpoint in the FOURIER landmark analysis; 4) calculated their absolute risk reduction (ARR) and number needed to treat (NNT) over 2 years (recent MI) or 10 years (remote MI).

**Results:** Our analysis included 90 recent MI and 489 remote MI patients initiating evolocumab in clinical practice per local reimbursement criteria, with up to 24 months follow-up. Median (inter-quartile range) age was 59 (53–67) and 61 (53–68) years in recent MI and remote MI patients, respectively. LDL-C before evolocumab was 3.8 (3.2–4.6) and 3.6 (3.0–4.5) mmol/L. Absolute LDL-C reduction on evolocumab was 2.2 (1.4–2.8) and 2.2 (1.6–2.8) mmol/L, meaning relative LDL-C reduction of 60% (44%–73%) and 62% (47%–72%), respectively. Predicted ARR with evolocumab was substantial, whether over 2 years (recent MI) or over 10 years (remote MI). See Table 1.

**Conclusions:** This cohort of evolocumab users in clinical practice had a higher baseline LDL-C and CV risk than patients enrolled in FOURIER. LDL-C reduction and RRR were very similar in recent MI and remote MI patients. However, patients with a recent MI had a higher short-term CV risk and therefore showed a larger ARR on evolocumab.

**Table 1.** CV risk simulation in recent MI and remote MI patients<sup>a</sup>

|                                           | REACH equation <sup>1</sup> | FOURIER <sup>2</sup> | Observational study <sup>3</sup> |
|-------------------------------------------|-----------------------------|----------------------|----------------------------------|
| <b>Recent MI (n=90)</b>                   |                             |                      |                                  |
| Annualized CV risk at baseline            | 5% (3%–7%)                  | 5% (4%–6%)           | 9% (7%–12%)                      |
| 2-year CV risk at baseline                | 10% (6%–14%)                | 10% (7%–12%)         | 18% (13%–23%)                    |
| 2-year CV risk on evolocumab              | 6% (4%–9%)                  | 6% (5%–8%)           | 11% (9%–15%)                     |
| RRR from a 2.2 (1.4–2.8) mmol/L reduction | 34% (23%–49%)               |                      |                                  |
| 2-year ARR                                | 3% (2%–5%)                  | 3% (2%–5%)           | 6% (3%–9%)                       |
| 2-year NNT                                | 33                          | 31                   | 18                               |
| <b>Remote MI (n=489)</b>                  |                             |                      |                                  |
| Annualized CV risk at baseline            | 3% (2%–6%)                  | 4% (3%–5%)           | 5% (4%–6%)                       |
| 10-year CV risk at baseline               | 30% (20%–44%)               | 31% (25%–40%)        | 38% (30%–47%)                    |
| 10-year CV risk on evolocumab             | 20% (14%–30%)               | 22% (17%–27%)        | 27% (21%–33%)                    |
| RRR from a 2.2 (1.6–2.8) mmol/L reduction | 35% (25%–44%)               |                      |                                  |
| 10-year ARR                               | 9% (5%–13%)                 | 9% (6%–13%)          | 11% (7%–15%)                     |
| 10-year NNT                               | 11                          | 11                   | 9                                |

<sup>a</sup>Figures represent medians (inter-quartile ranges)

<sup>1</sup>Am J Med. 2012 Jul;125(7):695–703.e1.; <sup>2</sup>N Engl J Med. 2017 May 4;376(18):1713–1722.; <sup>3</sup>Eur Heart J Qual Care Clin Outcomes. 2019 Jul 1;5(3):225–232.
